# Supplementary material for: Distinct strategies for intravascular triglyceride metabolism in hearts of mammals and lower vertebrate species
Source: JCI journal article supplement (doi:10.1172/jci.insight.184940), 2024-09-17

Full unedited blot  
for:

Figure S1 in the *JCI*  
submission,  
“Strikingly different  
patterns of LPL  
expression in hearts  
of mammals and  
lower vertebrates,”  
by Nguyen *et al.*

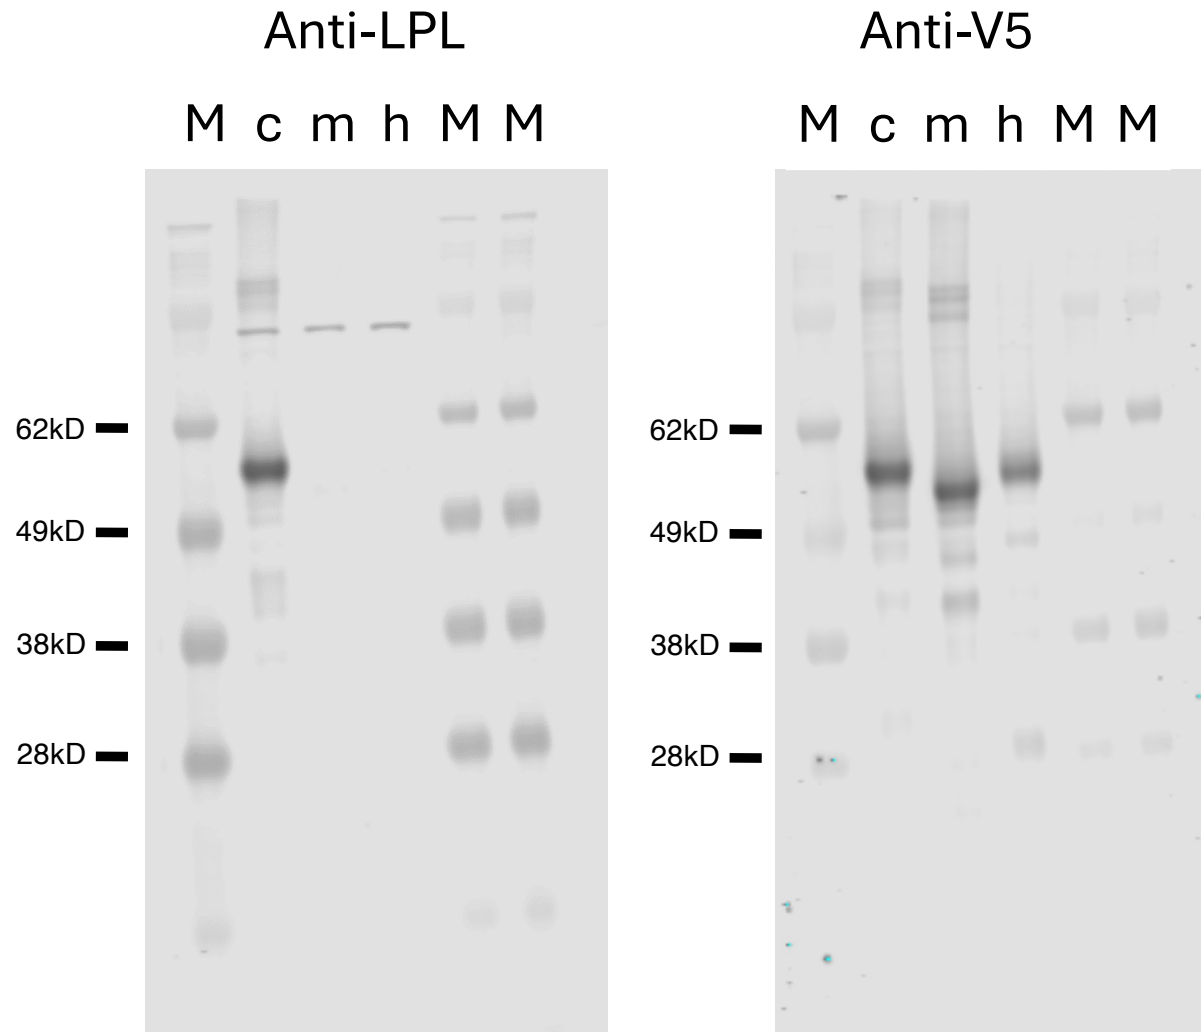

Supplement: sd2 [file 2]
